# Supplementary material for: Triiron Tetrairon Phosphate (Fe7(PO4)6) Nanomaterials Enhanced Flavonoid Accumulation in Tomato Fruits
Source: MDPI journal article supplement (doi:10.3390/nano12081341), 2022-04-13
Supplement: s1 [file s1]

## Supporting Information

### Triiron Tetrairon Phosphate ( $\text{Fe}_7(\text{PO}_4)_6$ ) Nanomaterials

#### Enhanced Flavonoid Accumulation in Tomato Fruits

Zhenyu Wang <sup>1,2</sup>, Xiehui Le <sup>1,2</sup>, Xuesong Cao <sup>1,2</sup>, Chuanxi Wang <sup>1,2</sup>, Feiran Chen <sup>1,2</sup>,  
Jing Wang <sup>1,2</sup>, Yan Feng <sup>1,2</sup>, Le Yue <sup>1,2,\*</sup> and Baoshan Xing <sup>3</sup>

<sup>1</sup> School of Environment and Civil Engineering, Institute of Environmental Processes and Pollution Control, Jiangnan University, Wuxi 214122, China; wang0628@jiangnan.edu.cn (Z.W.); 6191403013@stu.jiangnan.edu.cn (X.L.); caoxuesong@jiangnan.edu.cn (X.C.); wangcx2018@jiangnan.edu.cn (C.W.); chenfeiran@jiangnan.edu.cn (F.C.); wangjing03282022@163.com (J.W.); 15251870663@163.com (Y.F.)

<sup>2</sup> Jiangsu Engineering Laboratory for Biomass Energy and Carbon Reduction Technology, Wuxi 214122, China

<sup>3</sup> Stockbridge School of Agriculture, University of Massachusetts, Amherst, MA 01003, USA; bx@umass.edu

\* Correspondence: leyue@jiangnan.edu.cn; Tel.: +86-0510-85911911

**Text S1.** Ultra-performance liquid chromatography coupled with electrospray ionization and mass spectrometry (UPLC-MS/MS) conditions for auxin (IAA) and ABA detection.

**UPLC condition details:**

Briefly, 10  $\mu$ L of extraction was injected in Vanquish UPLC (Thermo Fisher, Germering, Germany) with a T3 column (Waters ACQUITY HSS, 2.1  $\times$  100 mm, 1.8  $\mu$ m pore size) coupled to a Mass Q EXTATIVE (Thermo Fisher, Bremen, Germany). The mobile phases were altered as: A, 0.01 % formic acid (in water, v/v); B, 0.01 % formic acid (in ACN, v/v). The elution gradient was described below: 0 min, 5 % B; 1.5 min, 5 % B; 9 min, 70 % B; 10 min, 70 % B; 10.1 min, 5 % B; 15 min, 5 % B at the flow rate of 0.35 mL min<sup>-1</sup>.

**MS condition details:**

PRM (Parallel Reaction Monitoring) was used as the collection mode of MS/MS and resolution of MS<sup>2</sup> was set as 17500. The isolation window and collision energy were 3.0 m/z and nce: 10, respectively. The negative polarity was selected as ESI mode and molecular ion ([M-H]<sup>-</sup>) of IAA and ABA were determined as 174.0560 and 263.1289.

**Text S2.** UPLC-MS/MS conditions for naringenin, quercetin and rutin detection.

### **Sample preparation and extraction**

The method of flavonoid extraction was modified from Martin-Rivilla et al. (2020) [82]. 100 mg of fruit powder was added to 1.5 mL of methanol/water (80:20, v: v). The mixture was vortexed for 1 min, sonicated for 5 min in ice bath, and centrifuged at 12000 rpm for 10 min at 4 °C to remove the sediment. Supernatants were collected for the UPLC-MS/MS analysis.

### **UPLC condition details:**

Briefly, 5  $\mu$ L of flavonoid extraction was injected in UPLC with a T3 column coupled to Mass Q EXTATIVE. The mobile phases were set as follow: A, 0.01 % formic acid (in water, v/v); B, 0.01 % formic acid (in ACN, v/v). The elution gradient was described below: 0 min, 5 % B; 1 min, 5 % B; 11 min, 95 % B; 12 min, 95 % B; 12.1 min, 5 % B; 14 min, 5 % B at the flow rate of 0.35 mL min<sup>-1</sup>.

### **MS condition details:**

PRM was used as the collection mode. The resolution of MS<sup>2</sup> was set as 17500. The isolation window and collision energy were 3.0 m/z and nce: 15, 30 and 45, respectively. Naringenin and quercetin were detected in positive mode and rutin was in negative mode.

### **Text S3. UPLC-MS/MS conditions for metabolomics.**

#### **UPLC condition details**

In brief, 5  $\mu$ L of extraction was injected in UPLC with a T3 column coupled to a Mass Q EXTATIVE. The binary mobile phases were consisted of A (water + 0.1 % formic acid) and B (acetonitrile + 0.1 % formic acid) and linear elution gradient was as follow: 0 min, 5 % B; 1.5 min, 5 % B; 10 min, 100 % B; 11 min, 100 % B; 11.5 min, 5 % B; 14 min, 5 % B at constant flow at 0.35 mL min<sup>-1</sup>.

#### **MS condition details**

Nitrogen was used as sheath gas (35 L/min) and aux gas (15 L/min). The spray voltage was set as 3 kV (-3 kV for negative mode and 3 kV for positive mode) and capillary temperature was 320 °C. The resolution of full MS was set as 70000 and scan range was acquired between 70 to 1050 m/z in full MS-dd MS<sup>2</sup> mode. The following dd-MS<sup>2</sup> product ion spectra were collected at resolution of 17500, isolation window of 1.5 m/z, and collision energy of nce: 20, 40, 60.

**Text S4.** Metabolic data processing.

The quality control (QC) samples were prepared by mixture of equal volume from each sample. And QC samples were inserted in sample sequences every 6 test samples. The raw files were analyzed by Compound Discoverer (CD) 3.1 performed on databases included Mass List, MzVault, Mzcloud and ChemSpider. The procedure of metabolite profiling process was conducted with peak detection (including filtration and noise elimination), peak matching, retention time alignment, peak annotation and compound identification on CD software [83]. The metabolites were discarded that RSD in QC samples were more than 30%. After combination of metabolites from both negative and positive mode, the selected metabolites were annotated by ID from HMDB or KEGG database. Based on metabolites abundance, principal component analysis (PCA), heatmaps and enrichment analysis were processed through Metaboanalyst 5.0 (<https://www.metaboanalyst.ca/>). For the selection of biomarkers from the metabolic analysis,  $VIP > 1$  and  $p < 0.05$  were set as standard.

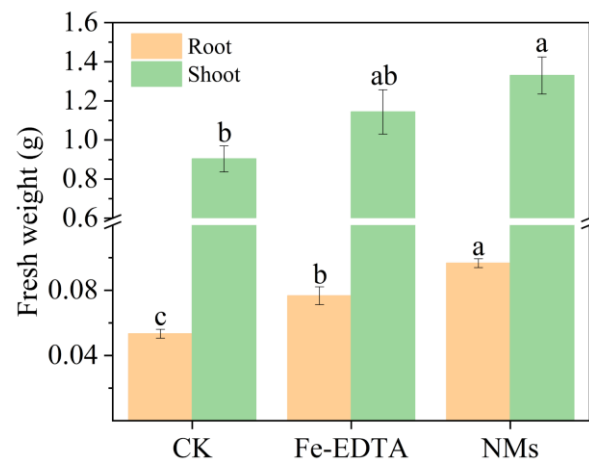

**Figure S1** Biomass of roots and shoots in different treatments. Different letters above columns (a, b and c) represent significance of  $p < 0.05$  and there is no significant difference between “ab” and “a”, nor between “ab” and “b”.

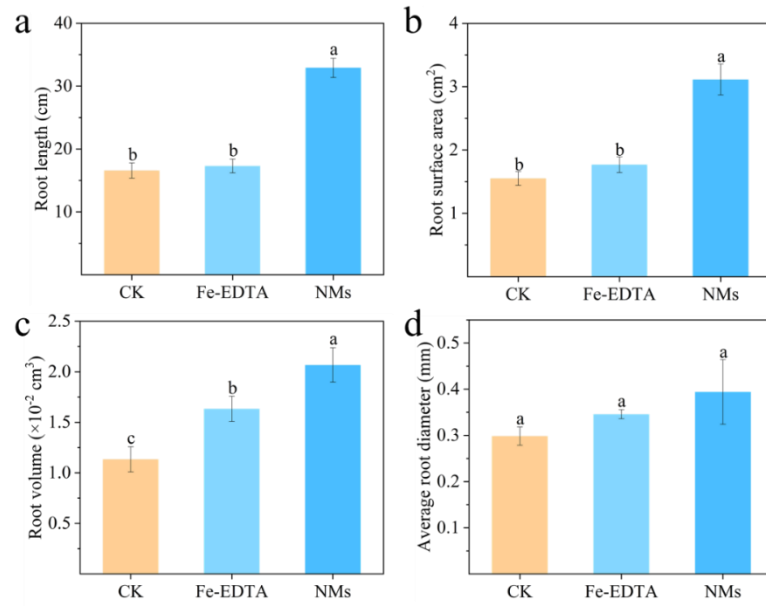

**Figure S2** Root length (a), surface area (b), volume (c), and average diameter (d) of tomato seedlings exposed to  $\text{Fe}_7(\text{PO}_4)_6$  NMs. Different letters above columns (a, b and c) represent significance of  $p < 0.05$ .

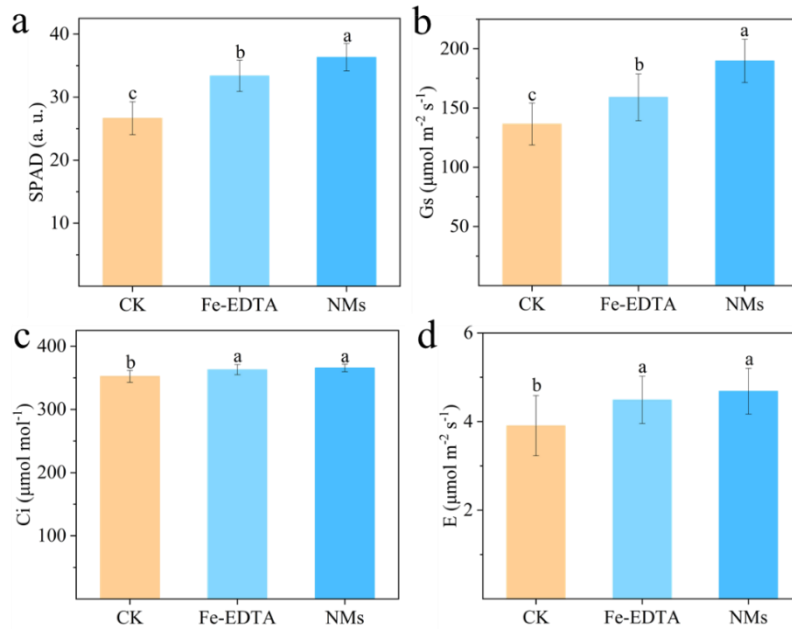

**Figure S3** Photosynthetic parameters of tomato seedlings. (a) chlorophyll SPAD value; (b–d) Gs, Ci, and E value. Different letters above columns (a, b and c) represent significance of  $p < 0.05$ .

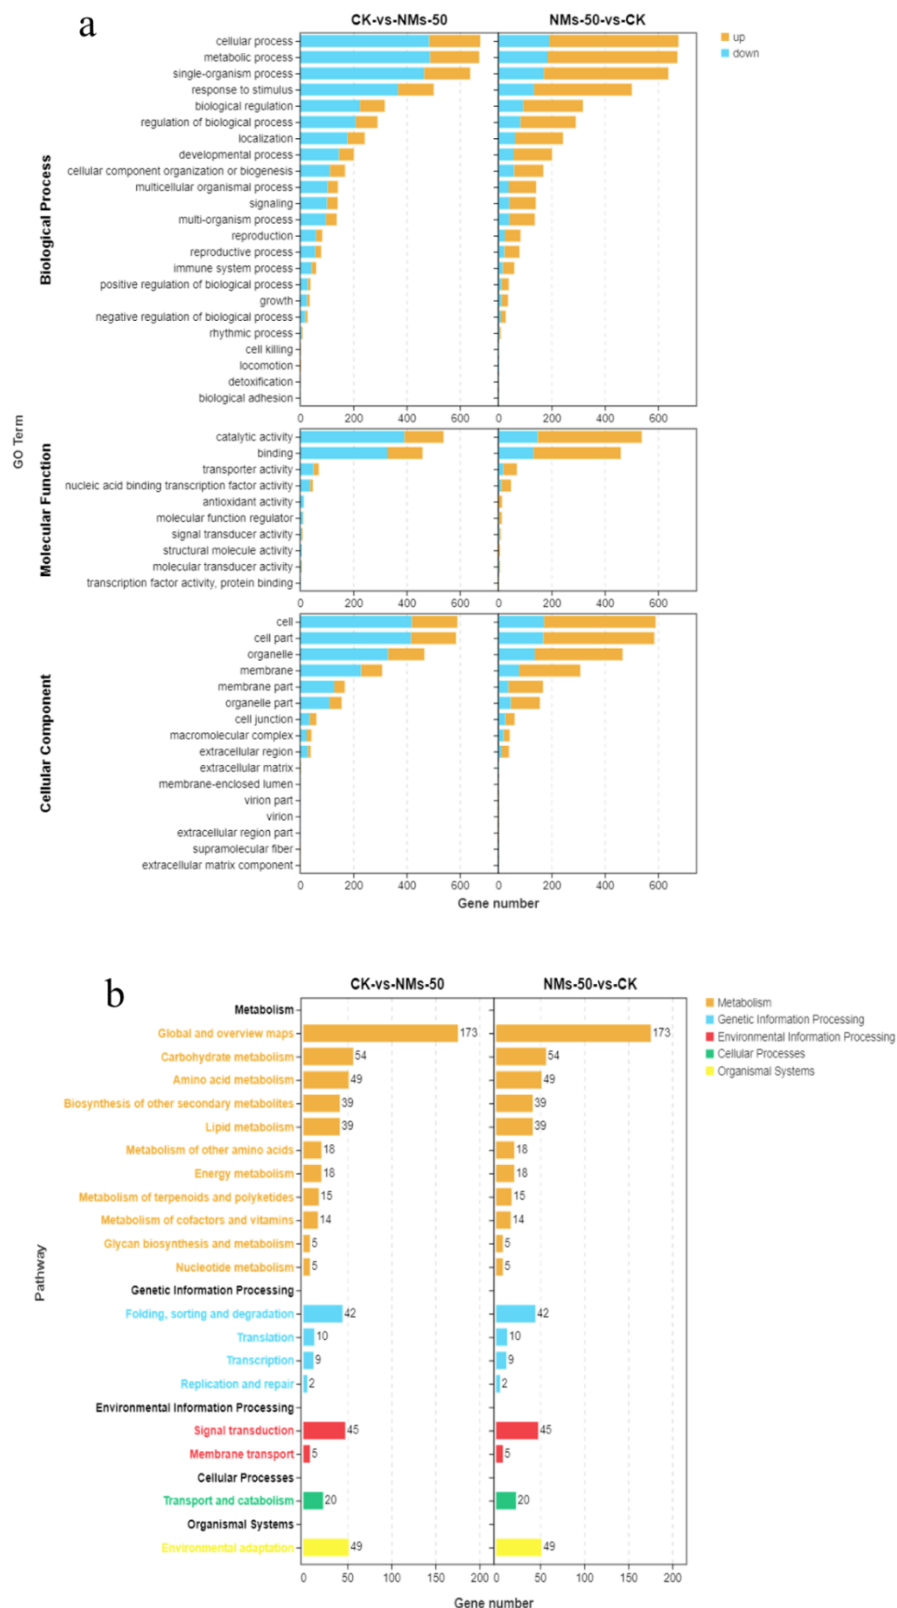

**Figure S4** GO enrichment analysis of DEGs (a) and KEGG enrichment analysis (b) in tomato fruits.



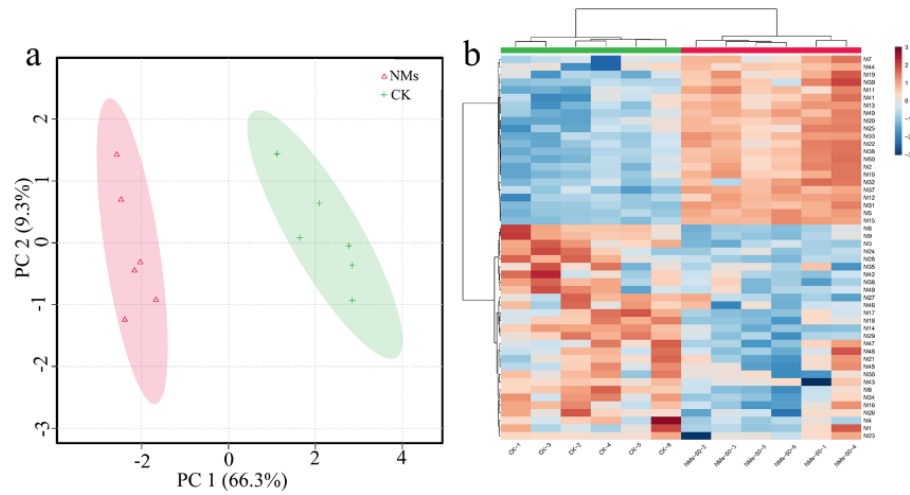

**Figure S5** PCA plot (a) and DEMs heatmap (b) in tomato fruits. VIP value > 1 and  $p < 0.05$  were set as DEMs standard.

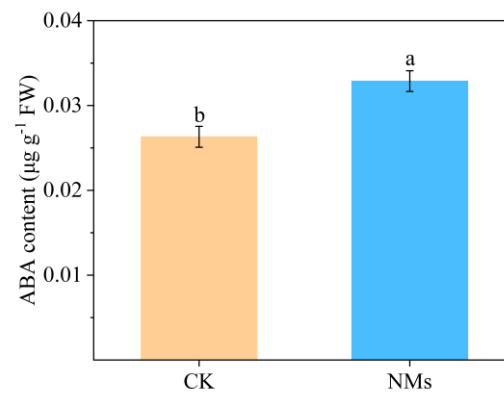

**Figure S6** ABA content in fruits. Different letters above columns (a and b) represent significance of  $p < 0.05$ .

**Table S1.** The properties of soil used in this research

| pH  | Total organic<br>carbon<br>(g kg <sup>-1</sup> ) | Total<br>nitrogen<br>(g kg <sup>-1</sup> ) | Total<br>phosphorus<br>(g kg <sup>-1</sup> ) | Total<br>potassium<br>(g kg <sup>-1</sup> ) |
|-----|--------------------------------------------------|--------------------------------------------|----------------------------------------------|---------------------------------------------|
| 5.9 | 97.0                                             | 27.5                                       | 0.3                                          | 7.7                                         |

**Table S2.** Primer sequences of flavonoids synthesis genes, PM H<sup>+</sup> ATPase genes and sucrose transporter genes.

| Gene                | Primer sets                                                                                                                            |
|---------------------|----------------------------------------------------------------------------------------------------------------------------------------|
| <i>SIPAL</i> [84]   | F: 5'-CGGTGAGGAGATTGATAAGG-3'<br>R: 5'-CATTTAGCAGATTGGAATAGGA-3'                                                                       |
| <i>SIC4H</i> [84]   | F: 5'-CTAGCTAACAACCCCGCCCA-3'<br>R: 5'-AACTCCTCCTGCCAACACCG-3'                                                                         |
| <i>SI4CL</i> [84]   | F: 5'-GCTCTCTGCCCCGTAACCAA-3'<br>R: 5'-CCACGATGAAAAGCTCATCATCAT-3'                                                                     |
| <i>SICHI</i> [84]   | F: 5'-ACAGGGGCAGAACTAACTGAAAA-3'<br>R: 5'-TCAAAAACCTTGTCAACTGGAGCA-3'                                                                  |
| <i>SICHS1</i> [84]  | F: 5'-AGGGGTGCGAAAGACCTTTAT-3'<br>R: 5'-TCCCTAGAGGTTGAAATGCT-3'                                                                        |
| <i>SIF3H</i> [84]   | F: 5'-TGGCGATCACGGTCATTATTTG-3'<br>R: 5'-GCATCTGGTGCTGGATTCTGG-3'                                                                      |
| <i>SIF3'H</i> [84]  | F: 5'-CTGGTGGCAAGAAAGGTGG-3'<br>R: 5'-CGAATGGGGTATGAAAAGTAAGTC-3'                                                                      |
| <i>SIFLS</i> [85]   | F:<br>5'-GCGCCGTCTCGCTCGGGAGGCGGCCGCGGAGTCTGAAAG<br>AGTTCTTATTTTG-3'<br>R:<br>5'-GCGCCGTCTCGCTCACATTTTTTCTTCTAACATGCAAAAA<br>ATTTTG-3' |
| <i>SI3GT</i> [73]   | F: 5'-CGAACGACGAAACACTGTTGA-3'<br>R: 5'-TGCAGCATAGATGGCATTGG-3'                                                                        |
| <i>SICAC</i> [84]   | F: 5'-TGGGTGTGCCTTTCTGAATG-3'<br>R: 5'-GCTAAGAACGATGGACCTAATG-3'                                                                       |
| <i>LHA1</i> [86]    | F:5'-GGATTGCTTTCACCCG-3'<br>R:5'-TTCGCTCCCATCACGACACC-3'                                                                               |
| <i>LHA2</i> [86]    | F:5'-TGAAATCGCTAGGCAACG-3'<br>R:5'-ATTCTATCACCCACTCACC-3'                                                                              |
| <i>LHA4</i> [86]    | F:5'-AGGGAATGGCAGGCTCT-3'<br>R:5'-GGGTGGTGCTTCAAAA-3'                                                                                  |
| <i>Tubulin</i> [86] | F:5'-GTGTTACTTGCTGTTTGAGA-3'<br>R:5'-TTTGTGCTCATCTTACCC-3'                                                                             |
| <i>SISUT1</i> [19]  | F:5'-GAACTCCCGGAGAAAGAAGAGCTAGA-3'<br>R:5'-TCGCATCACCGACTTGTCCACC-3'                                                                   |
| <i>SISUT2</i> [19]  | F:5'-TCTGAAGCAGCAGGAAGTGGA-3'<br>R:5'-CGGTGGAGGAAGAGGTAGATTAG-3'                                                                       |
| <i>SISUT4</i> [19]  | F:5'-CACCATCAACTGTGCCAATCTAAA-3'<br>R:5'-CAACACCTGGGAAATACTTGAAAAT-3'                                                                  |
| <i>SITIP4</i> [19]  | F:5'-ATGGAGTTTTTGAGTCTTCTGC-3'<br>R:5'-GCTGCGTTTCTGGCTTAGG-3'                                                                          |

**Table S3.** Hydrodynamic diameter and zeta potential of  $\text{Fe}_7(\text{PO}_4)_6$  NMs.

|                                 |                       |
|---------------------------------|-----------------------|
| Hydrodynamic Diameter ( $D_h$ ) | 716.89 $\pm$ 60.32 nm |
| Zeta potential                  | -14.37 $\pm$ 1.09 mV  |

**Table S4.** Fpkms value of DEGs in pathways from sucrose metabolism to flavonoid synthesis pathway.

| Genes            | Treatment    |              | Genes            | Treatment  |             |
|------------------|--------------|--------------|------------------|------------|-------------|
|                  | CK           | NMs          |                  | CK         | NMs         |
| <i>SISS</i>      | 165.48±30.34 | 333.32±18.89 | <i>SIEPSPS-1</i> | 45.22±1.10 | 38.15±1.29  |
| <i>SITPS6</i>    | 18.60±0.97   | 43.00±1.50   | <i>SICM2</i>     | 28.47±0.81 | 18.51±1.87  |
| <i>SITPP</i>     | 42.59±4.35   | 93.14±1.55   | <i>SI4CL1</i>    | 89.04±2.25 | 107.51±1.76 |
| <i>SITKL-1</i>   | 12.59±1.85   | 16.64±0.28   | <i>SICHI</i>     | 0.17±0.02  | 0.38±0.09   |
| <i>SIDHQ-SOR</i> | 33.24±0.43   | 28.18±1.37   | <i>SIMYB12</i>   | 11.45±0.96 | 16.06±1.55  |
| <i>SIPYL4</i>    | 39.87±1.07   | 115.01±9.74  |                  |            |             |

**Table S5.** Differentially expressed metabolites (DEMs) selected of tomato fruits in CK and upon Fe<sub>7</sub>(PO<sub>4</sub>)<sub>6</sub> NM exposure by VIP > 1 and *p* < 0.05. Name of metabolites and its codes were corresponding to heatmap (Figure. S5b).

| Code | Name                          | Code | Name                   |
|------|-------------------------------|------|------------------------|
| M1   | L-Glutamyl-L-glutamic acid    | M26  | 1-Methyladenine        |
| M2   | Trehalose                     | M27  | 9-HpODE                |
| M3   | Ferulic acid                  | M28  | Shogaol                |
| M4   | Ethyl sorbate                 | M29  | Sedanolid              |
| M5   | Ethyl myristate               | M30  | Salicylic acid         |
| M6   | D-Serine                      | M31  | Rutin                  |
| M7   | D-Mannose 6-phosphate         | M32  | Quercetin              |
| M8   | DL-Stachydrine                | M33  | Ribono-1,4-lactone     |
| M9   | DL-Carnitine                  | M34  | Phenethylamine         |
| M10  | Uridine 5'-diphosphogalactose | M35  | Palmitoleic acid       |
| M11  | D-Cysteine                    | M36  | N-Feruloyloctopamine   |
| M12  | D-(+)-Camphor                 | M37  | Naringenin             |
| M13  | Cysteinylglycine              | M38  | N-Acetylputrescine     |
| M14  | Corchorifatty acid F          | M39  | N8-Acetylspermidine    |
| M15  | Citral                        | M40  | N6-Acetyl-L-lysine     |
| M16  | Betaine                       | M41  | Methylmalonic acid     |
| M17  | Arachidonic acid methyl ester | M42  | L-Valine               |
| M18  | 6-Pentyl-2H-pyran-2-one       | M43  | L-Tyrosine             |
| M19  | 5'-S-Methyl-5'-thioadenosine  | M44  | L-Serine               |
| M20  | 5-Hydroxyindole               | M45  | L-Pyroglutamic acid    |
| M21  | 4-Oxoproline                  | M46  | Linoleoyl ethanolamide |
| M22  | 4-Guanidinobutyric acid       | M47  | L-(+)-Citrulline       |
| M23  | 3-Hydroxypicolinic acid       | M48  | Imidazoleacetic acid   |
| M24  | Tomatidine                    | M49  | Hexadecanedioic acid   |
| M25  | 1-Methyladenosine             | M50  | Glycylproline          |

**Table S6.** Relative content of metabolites detected in sucrose metabolism pathway.

| Name         | CK                            | NMs                           |
|--------------|-------------------------------|-------------------------------|
| UDP-glucose  | $(3.20 \pm 0.26) \times 10^5$ | $(3.76 \pm 0.54) \times 10^5$ |
| Trehalose    | $(2.29 \pm 0.11) \times 10^5$ | $(2.94 \pm 0.09) \times 10^5$ |
| D-Glucose-6P | $(1.58 \pm 0.10) \times 10^6$ | $(1.74 \pm 0.14) \times 10^6$ |
